# Supplementary material
Source: MDPI journal article supplement (https://www.mdpi.com/2076-3417/9/19/4000)
Supplement: s1 [file s1]

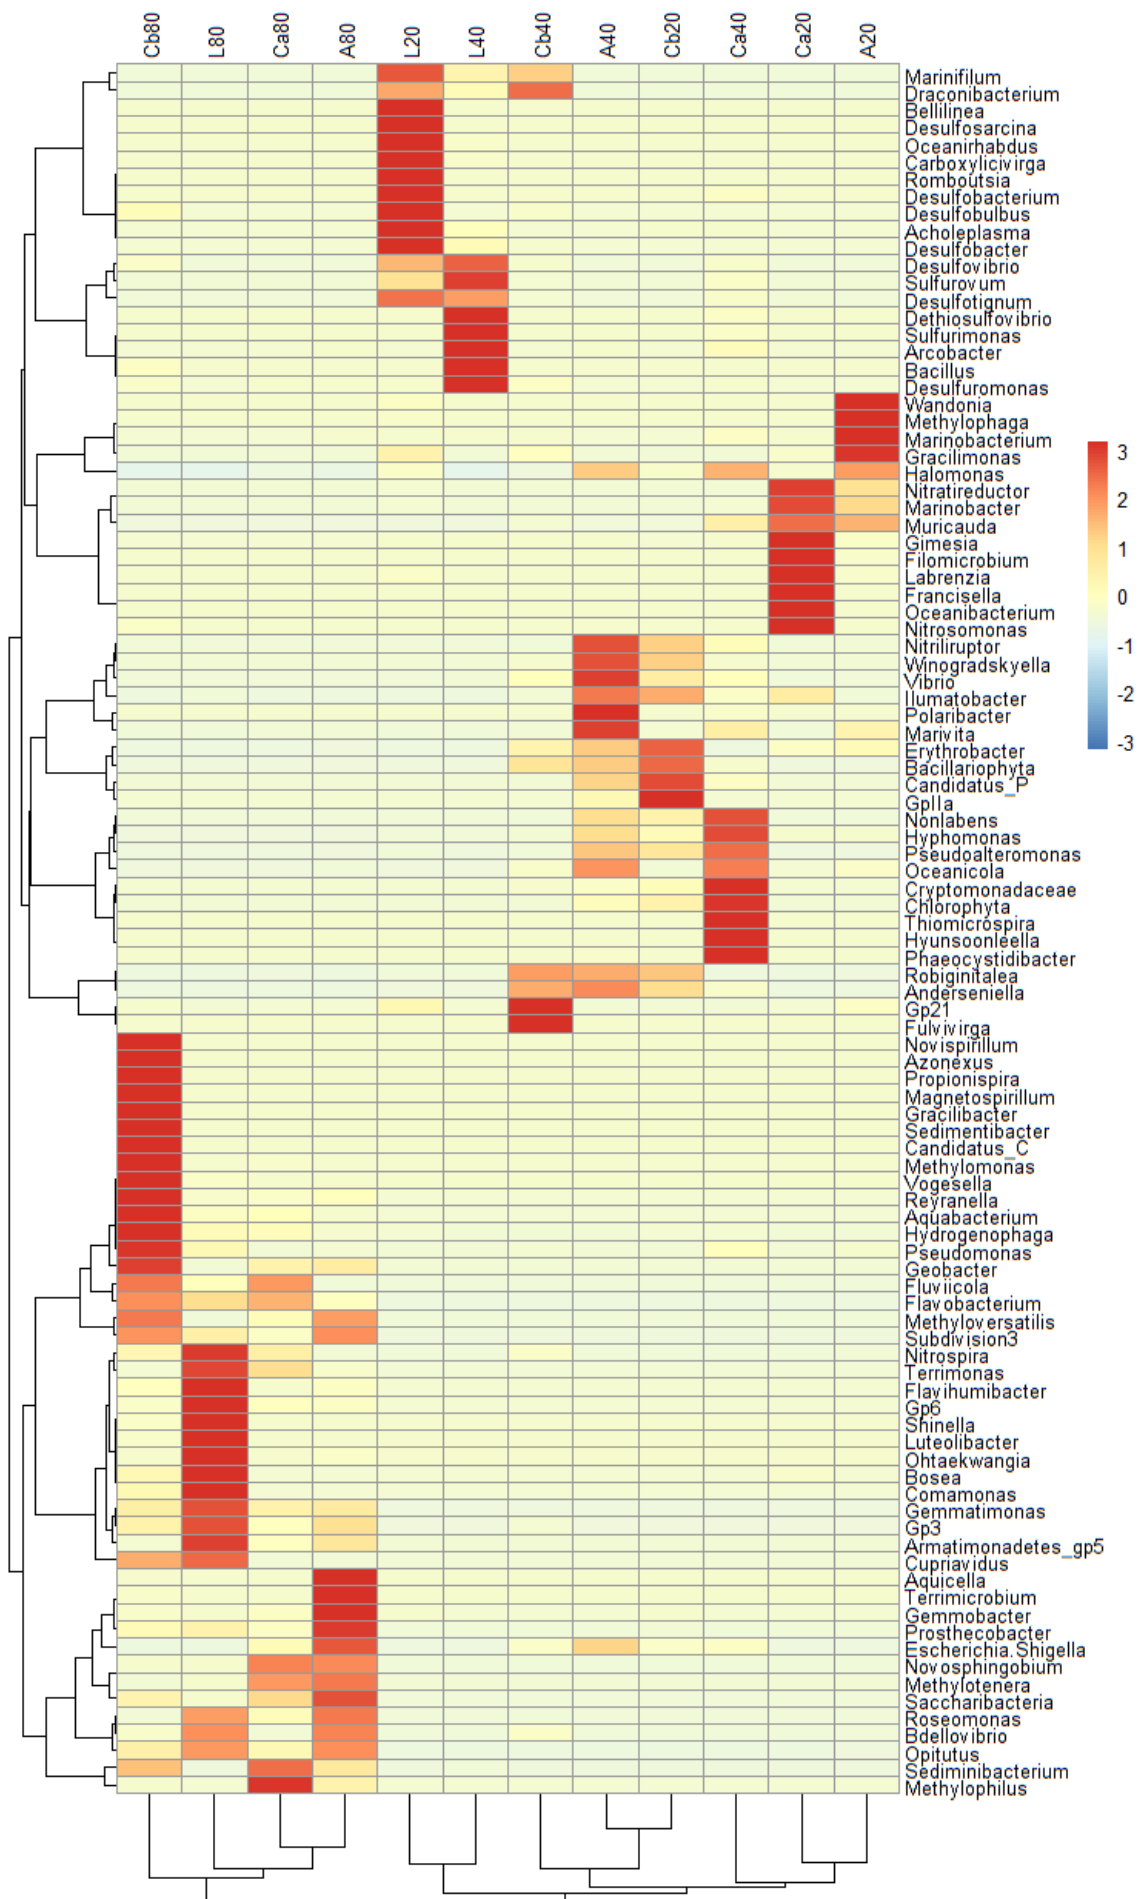

Figure S1. Biodegradation of sulfamethoxazole (SMX) by bacterial strains A12 and L (with fish pond sediment) in aerobic and anaerobic readdition experiments, respectively. Major microbial communities in aerobic and anaerobic experiments with or without bacterial strains A12 and L.

Table S1. Aerobic SA degradation rate constants ( $k$ ) and half-lives ( $t_{1/2}$ ) in Figure 1A.

| Treatment   | $k$ (1/d)            | $t_{1/2}$ (d)      | $R^2$ |
|-------------|----------------------|--------------------|-------|
| SMX 20 mg/L | $0.1052 \pm 0.00526$ | $4.75 \pm 0.23$    | 0.986 |
| SMX 2 mg/L  | $0.1328 \pm 0.00664$ | $3.76 \pm 0.19$    | 0.982 |
| SMZ 20 mg/L | $0.0022 \pm 0.00011$ | $227.27 \pm 11.36$ | 0.909 |
| SMZ 2 mg/L  | $0.0006 \pm 0.00003$ | $833.33 \pm 41.66$ | 0.917 |
| SDM 20 mg/L | $0.0009 \pm 0.00005$ | $555.55 \pm 27.77$ | 0.902 |
| SDM 2 mg/L  | $0.0014 \pm 0.00007$ | $357.14 \pm 17.85$ | 0.907 |

$R^2$ : the coefficient of determination.

Table S2. Anaerobic SA degradation rate constants ( $k$ ) and half-lives ( $t_{1/2}$ ) in Figure 1B.

| Treatment   | $k$ (1/d)            | $t_{1/2}$ (d)      | $R^2$ |
|-------------|----------------------|--------------------|-------|
| SMX 20 mg/L | $0.1252 \pm 0.00626$ | $3.99 \pm 0.19$    | 0.968 |
| SMX 2 mg/L  | $0.1269 \pm 0.00634$ | $3.94 \pm 0.18$    | 0.981 |
| SMZ 20 mg/L | $0.0036 \pm 0.00018$ | $138.88 \pm 6.94$  | 0.958 |
| SMZ 2 mg/L  | $0.0004 \pm 0.00002$ | $1250 \pm 62.5$    | 0.959 |
| SDM 20 mg/L | $0.0023 \pm 0.00011$ | $217.39 \pm 10.86$ | 0.977 |
| SDM 2 mg/L  | $0.0021 \pm 0.00010$ | $238.09 \pm 11.91$ | 0.988 |

$R^2$ : the coefficient of determination.

Table S3. SMX degradation rate constants ( $k$ ) and half-lives ( $t_{1/2}$ ) in Figure 4.

| Strain                        | $k$ (1/d)            | $t_{1/2}$ (d)      | $R^2$ |
|-------------------------------|----------------------|--------------------|-------|
| Sterilized medium (aerobic)   | $0.0048 \pm 0.00024$ | $104.16 \pm 5.21$  | 0.936 |
| A2                            | $0.2989 \pm 0.02491$ | $1.67 \pm 0.05$    | 0.987 |
| A12                           | $0.4983 \pm 0.01494$ | $1.01 \pm 0.09$    | 0.975 |
| Sterilized medium (anaerobic) | $0.0022 \pm 0.00011$ | $227.27 \pm 11.36$ | 0.911 |
| M                             | $0.1305 \pm 0.00652$ | $3.83 \pm 0.19$    | 0.979 |
| L                             | $0.2080 \pm 0.01040$ | $2.40 \pm 0.12$    | 0.984 |

The half-live of each treatment (with addition of isolated bacterial strains) was significantly different from the sterilized medium (without addition of isolated bacterial strains) (t-test  $P < 0.05$ ).

$R^2$ : the coefficient of determination.

Table S4. 16S rRNA gene sequence analysed by the NCBI Blast in Figure 5.

| Strain | Name                                                   | Identity        | Accession Number |
|--------|--------------------------------------------------------|-----------------|------------------|
| A2     | <i>Vibrio alginolyticus</i> strain ATCC 17749          | 1319/1324 (99%) | NR_118258.1      |
| A12    | <i>Vibrio alginolyticus</i> strain ATCC 17749          | 1306/1314 (99%) | NR_118258.1      |
| L      | <i>Pseudomonas pseudoalcaligenes</i> strain Stanier 63 | 1267/1285 (99%) | NR_037000.1      |
| M      | <i>Marinobacter pelagius</i> strain HS225              | 1285/1299 (99%) | NR_043863.1      |

Table S5. SMX degradation rate constants ( $k$ ) and half-lives ( $t_{1/2}$ ) in Figure 7.

| Strain                          | $k$ (1/d)            | $t_{1/2}$ (d)      | $R^2$ |
|---------------------------------|----------------------|--------------------|-------|
| Sterilized sediment (aerobic)   | $0.0028 \pm 0.00014$ | $178.57 \pm 8.93$  | 0.912 |
| Sediment (aerobic)              | $0.0148 \pm 0.00074$ | $33.78 \pm 1.69$   | 0.981 |
| Sediment + A2                   | $0.4258 \pm 0.02129$ | $0.67 \pm 0.04$    | 0.986 |
| Sediment + A12                  | $0.7378 \pm 0.03689$ | $1.17 \pm 0.06$    | 0.997 |
| Sterilized sediment (anaerobic) | $0.0013 \pm 0.00006$ | $384.61 \pm 19.23$ | 0.957 |
| Sediment (anaerobic)            | $0.0822 \pm 0.00411$ | $6.08 \pm 0.30$    | 0.965 |
| Sediment + M                    | $0.1095 \pm 0.00547$ | $4.56 \pm 0.23$    | 0.993 |
| Sediment + L                    | $0.1701 \pm 0.00851$ | $2.94 \pm 0.14$    | 0.981 |

The half-live of each treatment (with addition of isolated bacterial strains) was significantly different from the sediment and sterilized sediment (without addition of isolated bacterial strains) (t-test  $P < 0.05$ ).

$R^2$ : the coefficient of determination.

Table S6. The aerobic SMX degradation rate constants ( $k$ ) and half-lives ( $t_{1/2}$ ) following the 3<sup>rd</sup> and 4<sup>th</sup> additions of SMX during 81 d of incubation in Figure 8A.

| Treatment                | With degrading bacteria |                 |       | Without degrading bacteria |                  |       |
|--------------------------|-------------------------|-----------------|-------|----------------------------|------------------|-------|
|                          | $k$ (1/d)               | $t_{1/2}$ (d)   | $R^2$ | $k$ (1/d)                  | $t_{1/2}$ (d)    | $R^2$ |
| 3 <sup>rd</sup> addition | $0.1853 \pm 0.0092$     | $2.69 \pm 0.13$ | 0.969 | $0.0335 \pm 0.0016$        | $14.9 \pm 0.746$ | 0.988 |
| 4 <sup>th</sup> addition | $0.4299 \pm 0.0215$     | $1.16 \pm 0.06$ | 0.998 | $0.024 \pm 0.0012$         | $20.8 \pm 1.041$ | 0.983 |

The half-lives of all treatment pairs between with and without bacteria were significantly different (paired t-test  $P < 0.05$ ).

$R^2$ : the coefficient of determination.

Table S7. The anaerobic SMX degradation rate constants ( $k$ ) and half-lives ( $t_{1/2}$ ) following the 3<sup>rd</sup> and 4<sup>th</sup> additions of SMX during 81 d of incubation in Figure 8D.

| Treatment                | With degrading bacteria |                |       | Without degrading bacteria |                 |       |
|--------------------------|-------------------------|----------------|-------|----------------------------|-----------------|-------|
|                          | $k$ (1/d)               | $t_{1/2}$ (d)  | $R^2$ | $k$ (1/d)                  | $t_{1/2}$ (d)   | $R^2$ |
| 3 <sup>rd</sup> addition | $0.1605 \pm 0.008$      | $3.1 \pm 0.15$ | 0.985 | $0.0087 \pm 0.0004$        | $57.4 \pm 2.87$ | 0.979 |
| 4 <sup>th</sup> addition | $0.1023 \pm 0.0051$     | $4.9 \pm 0.24$ | 0.979 | $0.0068 \pm 0.0003$        | $73.5 \pm 3.67$ | 0.981 |

The half-lives of all treatment pairs between with and without bacteria were significantly different (paired t-test  $P < 0.05$ ).

$R^2$ : the coefficient of determination.
